# Supplementary material
Source: publisher figshare collection journal article supplement (https://rs.figshare.com/ndownloader/files/18107402)
Supplement: Supplementary file 1 [file 18107402]

## Sheet: Sheet1
study	age	parity	prepregwtlbs	heightin	prepregbmi	Gestational Age (weeks) at US	placentalvolcm3	birthwtg	1=Nocomplication
c470	35	3	155	64	26.6	12	121.4	2520	1
c805m	33	1	180	64	30.9	13	120.2	3348	1
c391	31	1	128	66	21.3707	12.5	118.9	3520	1
c422	29	0	245	68	37.3	14	114.3	3975	0
c22	35	1	232	67	37.5868	12	114.02	3381	1
c196	34	0	136	64	24.1477	13	111.9	3547	0
c661	23	0	115	64	19.7	13.3	111.68	3560	1
c278	36	1	190	70	28.2004	12.7	111.5	1434	1
c154	35	1	230	67	37.2628	11.7	110.6	2687	0
c542	34	2	125	60	24.5	13	109.7	2375	0
c503	34	2	215	65	34.7	11.6	107	3292	1
c436	27	1	200	67	31.3	12.4	106.9	3370	0
c906m	35	2	215	64	36.9	11.6	105.5	3857	1
c456	32	1	150	62	27.5	12.4	104.3	3240	0
c767	35	2	120	62	22	13.4	100.68	3355	1
c492	26	0		66		11.6	100.2	3632	0
c560	27	1	115	65	19.2	13.1	100.1	3402	1
c15	37	1	165	69	25.2048	12.1	99.15	3131	0
c599	29	0	138	66		12.4	98.1	3690	1
c532	33	0	136	67	21.7	12.3	96.4	3665	1
c770	40	0	125	62	22.9	12.5	95.89	2988	1
c897m	30	0	120	62	22	13.4	95.7	3368	1
c337	37	1	198	62	37.461	12.9	95.3	2849	1
c624	28	0	225	65	34.3	12.2	94.4	3655	1
c755	33	0	170	62	31.1	12.2	94.17	3920	1
c942m	34	1	160	67	25.1	12.5	93.9	3562	1
c495	30	0	133	64	22.8	11.3	93.8	2310	1
c567	29	3	180	68	27.4	12.2	93.5	4010	1
c829	29	0	138	63	24.5	12.2	92	2725	1
c893m	36	2	140	70	20.1	11.3	91.6	3717	1
c168	34	4	115	59	24.0265	12.6	91.4	3604	1
c81	23	0	134	64	23.7926	13.1	91.1	3430	1
c417	30	0	169	69	25	12	90.9	3294	1
c2	29	1	212	68	33.3438	12.6	90.24	3405	1
c772m	31	1	110	65	18.3	11.4	90.1	3717	1
c313	35	0	135	64	23.9702	11.7	89.6	3395	1
c688m	31	1	170	67	26.7	12	88.1	4058	1
c809m	26	2	190	62	34.8	13.2	88	1134	1
c146	32	0	226	66	37.7327	13.1	87.9	3587	0
c283	29	3	185	69	28.2599	12.1	87.2	3458	1
c635	35	3	108	61	20.4	13.4	86.9	2392	0
c684m	35	2	160	65	26.6	13.2	86.4	4256	1
c620	34	0	150	63	26.6	13	86.34	3810	1
c20	32	0	128	65	22.0334	12.6	85.92	2930	1
c339	38	4	130	63	23.821	12	85.7	4320	1
c630	29	0	135	66	21.8	12.2	85.05	3555	1
c484	25	0	125	62	22.9	11.5	84	3985	1
c734m	27	0	140	65	23.3	12.2	84	3746	1
c341	29	0	195	68	30.67	12.7	83.9	3950	1
c246	31	2	155	65	26.681	12.3	83.7	1840	0
c328	37	1	193	63	35.365	13	83.2	3125	1
c410	42	0	168	67	26.3	12.1	83.2	3170	1
c10	38	1	114	62	21.5684	11.9	82.54	3012	1
c441	37	6	200	65	33.3	11.5	82.5	2494	0
c263	38	4		68		12.5	82.2	4075	1
c191	36	0	192	65	33.05	11.4	81.5	3436	1
c892m	38	3	150	67	23.5	12.6	81.4	3802	1
c264	24	0	121	63	22.1718	12.9	80.9	2916	1
c39	29	3	165	65	28.4024	13.3	80.7	3350	1
c307	37	0	125	64	22.1946	14.1	80.7	3611	1
c433	31	3	200	66	32.3	12.2	80.7	2914	1
c301	35	1	135	62	25.5416	12.4	80.4	2948	1
c437	21	0	135	65	22.5	13.1	80.4	780	1
c547	23	2	145	64		13.5	80.3	670	1
c730m	32	0	98	65	16.3	12.2	80.3	2554	1
c577	32	1	178	63	31.6	12.1	79.9	3885	1
c798m	32	1	140	64	24.1	12.6	79.9	4077	1
c737m	36	0	170	58	25.9	12.1	79.7	4114	1
c346	35	1	317	68	49.8584	12.9	79.6	2870	0
c901m	26	1	235	65	39.1	12	79.5	3065	0
c929m	32	0	145	67	22.7	12.4	79.4	4630	0
c937	37	1	120	60	23.5	11.6	78.9	4220	1
c779m	36	1	260	69	38.4	11.3	78.7	3990	1
c370	29	0	150	63	27.4857	13.6	78.6	3955	0
c868	44	1	115	61	21.8	11.4	78.5	2580	1
c293	36	2	131	68	20.604	12	78.3	3376	1
c411	39	0	140	60	27.4	11.4	78.1	3305	1
c96	31	1	180	70	26.7161	11.4	78	3602	1
c941m	36	0	155	67	24.3	12.1	77.8	3118	1
c443	37	1	220	67	34.5	12.5	77.5	4380	1
c795m	32	0	130	66	21	12	77.5	3629	1
c656m	35	0	140	62	25.6	13.5	77.4	3799	1
c429	37	3	260	68	39.6	11.5	76.9	3880	1
c322	27	5	300	67	48.6037	13.9	76.5	3436	1
c791m	34	0	205	69	30.3	12	75.9	3840	1
c9	39	1	170	63	31.1505	11.7	75.52	3206	1
c733m	35	2	170	65	28.3	13.2	75.5	3150	1
c802m	35	0	210	70	30.1	13	75.4	3462	1
c94	34	2	210	68	33.0293	12.3	75.1	3620	1
c394	27	1	216	63	39.5795	13.4	74.8	4015	1
c917	42	1	200	60	39.1	13	74.5	4110	1
c494	40	1	293	66	47.3	13	74.1	3944	1
c832m	40	2	118	66	19.1	11.3	73.8	3091	1
c888m	34	0	130	65	21.6	12.6	73.8	3230	0
c619	34	2	135	63		12.2	73.71	4337	1
c258	34	0	133	66	22.2055	12.9	73.7	3105	1
c753	38	1	140	63	24.8	11.3	73.4	3575	1
c711m	30	1	123	66	19.9	12.2	72.6	3220	1
c944m	33	0	130	64	22.3	12.4	72.5	4070	0
c428	22	1	240	63	42.6	12	72.3	3315	1
c483	34	1	140	67	22	12.2	72.2	3920	0
c17	34	0	208	66	34.7274	12.6	72.05	3615	0
c318	39	3	125	63	22.9048	12.3	71.1	3547	1
c353	31	1	137	60	27.6768	12	71	3335	1
c934	32	0	309	67	48.4	11.5	70.7	159	0
c796m	34	2	165	69	24.2	11.2	70.7	3519	1
c886m	26	0	117	65	19.5	11.6	69.9	3093	0
c262	32	4	180	65	30.9844	13.1	69.8	3100	1
c426	37	2	93	62	17	11.4	69.8	3230	1
c626	23	2	158	64	27.1	11.4	69.45	3290	1
c451	24	4	186	66	30	12.5	69.4	3315	1
c173	35	1	157	69	23.9827	13.7	69.3	3120	1
c260	29	1	225	72	31.5657	11.7	68.3	4000	1
c883m	30	5	182	63	32.3	13.4	68.3	3665	1
c230	28	0	143	65	24.6154	11.4	68.2	4730	1
c379	37	0	115	66	19.2003	13.6	68.1	3433	1
c164	38	2	256	70	37.9963	13.1	67.9	3420	1
c310	38	1	200	66	33.3918	12.9	67.9	3494	1
c349	30	1	225	67	36.4527	12	67.8	3875	0
c326	38	0	160	64	28.4091	13	67.6	3558	1
c36	29	1	190	63	34.8153	12.7	67.5	3300	1
c473	34	1	125	60	24.5	12.3	67.5	3200	1
c568	31	0	330	70	47.4	12.2	67.3	2729	0
c365	28	1	310	68	48.7575	13.7	67.1	3447	0
c302	41	2	181	69	27.6489	11.6	66.6	3527	1
c386	39	2	145	67	23.4918	13	66.1	3460	1
c689m	37	2	130	64	22.3	11.3	66.1	3377	1
c186	37	0	220	65	37.8698	12.3	65.9	3377	0
c432	20	0	171	63	30.3	12.4	65.9	3799	0
c344	40	1	135	68	21.2331	12.4	65.5	3605	1
c151	30	2	184	63	33.7158	12.1	65.2	4196	1
c813m	37	1	140	65	22.6	13.1	65	3750	1
c140	33	3	137	62	25.92	11.6	64.6	2738	1
c131	37	1	138	68	21.7049	13	64.5	3585	1
c351	39	1	150	64	26.6335	11.4	64.4	3604	1
c902m	25	1	160	66	25.8	12.5	64.3	3925	1
c182	37	1	190	65	32.7058	11.4	64.2	3186	1
c490	36	1	140	65	23.3	12	64.2	3260	1
c453	32	0	100	62	18.3	12.4	64.1	2830	0
c471	19	0	128	64	22	13.4	64.1	2544	0
c253LTF	42	0	118	64	20.9517	11.9	63.8
c618	19	0	150	63	26.6	11.6	63.8	2220	1
c658m	35	1	258	65	43	12.4	63.6	3827	1
c300	33	1	130	66	21.7047	12.6	63.2	4015	1
c501	28	2	130	62	23.8	13.3	63.1	3190	0
c954m	35	1	156	69	23	12.3	63	3573	1
c294	38	2	155	68	24.3787	12.4	62.7	3380	1
c817m	40	2	220	60	43	11.5	62.7	3830	1
c298	21	0	125	59	26.1158	13	62.5	3925	1
c277	39	2	174	66	29.0508	12.9	62.2	3200	1
c759	33	2	145	67	22.7	12.4	62.17	2700	0
c784	32	0	145	69	21.4	11.6	62.16	3859	1
c116	21	3	155	67	25.1119	13.6	62.1	3745	1
c812m	34	0	140	65	23.3	12.1	62.1	3884	1
c78	24	0	135	66	22.5394	12.9	61.9	3320	1
c372	31	1	180	68	28.3108	12.7	61.9	2895	1
c740m	38	0	115	65	19.2	12.2	61.9	3531	1
c377	29	4	150	68	23.5923	13.6	61.5	3294	0
c646m	40	0	190	67	29.8	11.4	61.5	3345	0
c449	29	1	124	66	20	12.3	61.4	3650	1
c28	32	2	200	71	28.8543	11.9	61.38	3489	1
c338	37	3	120	68	18.8739	11.9	61.3	3050	1
c362	36	1	97	60	19.596	13.2	61.3	3117	1
c211	27	0	140	63	25.6534	13.6	61.2	1589	0
c896m	38	4	140	62	25.6	12.1	61.2	3345	1
c336	33	2	145	63	26.5695	12.3	61.1	2426	0
c606	31	3	185	67	29	13.1	61	3325	0
c726m	27	0	140	65	23.3	12.3	60.9	3033	1
c424	34	1	132	65	22	11.5	60.7	3805	1
c454	24	2	178	65	29.6	12.4	60.5	3178	1
c500	34	0	123	58	25.7	11.5	60.5	2865	1
c421	19	0	170	63	30.2	12.1	60.2	397	0
c415	32	0	125	66	20.2	12.3	60.1	2475	0
c647m	33	0	118	63	20.9	12.2	60.1	3521	1
c416	24	0	120	64	20.6	12	60	3163	1
c445	25	2	120	61	22.7	11.6	60	2970	0
c497	33	2	115	62	21	12.6	60	3590	1
c312	30	0	128	66	21.3707	12.1	59.9	3717	1
c907m	34	3	235	70	33.8	11.5	59.9	3596	1
c775m	36	7	116	62	21.1	11.3	59.9	3065	1
c895m	39	2	135	65	22.5	11.4	59.8	3632	1
c447	38	0	135	70	19.4	12.3	59.2	2485	1
c534	23	2		64		13.4	59	3190	1
c134	29	5	230	66	38.4005	13.2	58.6	4460	1
c282	29	0	138	67	22.3577	12.1	58.6	3469	1
c303	33	5	234	64	41.5483	14	58.6	2500	0
c355	37	5	317	67	51.3579	11.7	58.3	3320	1
c870	38	1	115	62	21	12.3	58.3	3202	1
c645m	29	0	189	62	34.6	12.1	58.3	2863	1
c943m	29	0	160	68	24.3	11.5	58.1	3130	1
c79	28	0	135	65	23.2383	12	58	4210	1
c6	35	0	165	65	28.4024	12.3	57.94	2735	1
c71	25	1	145	66	24.209	11.4	57.8	2990	1
c927m	35	0	140	66	22.6	11.4	57.8	3575	1
c706	36	1	140	69	20.7	12.2	57.64	3920	1
c287LTF	27	0	121	63	22.1718	11.9	57.6
c251	36	2	222	65	38.2141	12	57.5	4124	1
c63	33	0	148	68	23.2778	11.6	57.3	3200	1
c887m	26	0	130	66	21	13	57.3	2710	1
c720m	35	1	150	64	25.8	12.6	57.3	3289	1
c325	37	2	147	65	25.3039	11.4	57.1	2955	0
c721m	37	0	135	60	26.4	13.3	57	3178	1
c648m	33	0	175	65	29.2	12.5	56.8	2949	1
c776m	35	1	130	68	19.8	11.4	56.8	3065	1
c109	31	0	203	67	32.8885	11.7	56.7	3200	1
c117	33	0	165	68	25.9516	13.1	56.7	3386	1
c488	43	2	185	67	29	12.4	56.5	3600	1
c221	37	1	210	67	34.0226	12.4	56.3	3660	1
c296	30	1	170	67	27.5421	11.6	56.3	4005	1
c240	35	2	196	68	30.8273	11.6	56.2	3802	1
c926m	28	0	110	62	20.1	12.2	56	3001	1
c114	32	0	130	64	23.0824	12.3	55.9	4250	1
c115	25	2	183	65	31.5008	12.7	55.9	3915	0
c884m	38	1	140	67	22	11.4	55.8	3290	1
c643m	37	1	168	64	28.9	12.2	55.8	3629	1
LTF 30	23	0		65		12.7	55.56
c189	40	3	120	66	20.0351	11.7	55.5	3700	1
c348	33	2	145	67	23.4918	12	55.4	3675	1
c592	40	1	130	66	21	13.6	55.1	3115	1
c31	32	0	135	67	21.8716	12.7	54.93	3320	1
c908m	32	0	220	69	32.5	12.1	54.9	3727	1
c507	27	2	157	67	24.6	11.4	54.8	3377	1
c113	27	0	125	67	20.2515	11.7	54.4	2897	1
c176	26	3	230	67	37.2628	13.7	54.2	3509	1
c297	35	0	150	63	27.4857	12	54.2	3377	1
c330	35	1	122	65	21.0005	12.6	54.1	3468	1
c357	26	0	148	63	27.1193	12.1	54.1	3325	1
c83	38	4	158	60	31.9192	13.3	54	3040	1
c407	28	0	124	68	18.9	12	54	3685	1
c412	23	0	121	65	20.1	11.3	54	2608	0
c773m	36	1	160	66	25.8	11.2	54	3774	1
c778m	26	0	142	65	23.7	11.6	53.9	3689	1
c3	34	1	104	63	19.0568	12.3	53.73	4087	1
c655m	36	1	125	62	22.9	12.1	53.7	3182	1
c414	30	1	140	66	22.6	12.2	53.6	3290	1
c136	40	3	155	68	24.3787	12.3	53.5	47	1
c712m	38	1	195	65	32.5	11.3	53.4	3973	1
c137	35	0	130	63	23.821	12	53.2	3405	1
c252	38	4	121	64	21.4844	11.7	53.2	2688	0
c627	31	1	175	65	29.2	11.6	53.02	4155	1
c637	33	3	155	65		13.2	53	3819	1
c644m	40	0	200	55	33.3	12.1	53
c316	34	0	160	65	27.5417	11.6	52.9	3445	1
c440	39	1	140	62	25.6	11.4	52.9	3240	0
c597	28	0	157	65	26.2	12.5	52.9	3760	1
c347	33	2	130	66	21.7047	11.9	52.8	3345	1
c916	27	3	150	64	25.8	13.1	52.8	2240	0
c797m	39	1	165	65	27.5	11.6	52.7	3348	1
c5	33	2	125	65	21.5169	14.3	52.63	3460	1
c247	34	2	122			13	52.6	3250	0
c667	32	1	135	66		13.1	52.57	3700	1
c569	29	0	130	66	21	12.2	52.4	2830	1
c103	24	2	170	65	29.263	13.1	52.3	3486	1
c245	23	0	139	61	27.1677	13.3	52.3	2470	0
c496	37	0	173	63	30.7	12.3	52.3	3100	1
c35	39	1	112	62	21.1901	12	52.21	3263	1
c241	29	0	125	65	21.5169	11.4	52.2	4315	1
c947m	30	1	108	65	18	12.2	52.2	3070	1
c923m	32	0	155	70	22.3	11.3	52.2	2845	0
c378	22	1	110	66	18.3655	12.6	51.9	3775	1
c955m	40	0	138	62	25.3	12.4	51.9	2835	1
c945m	35	3	111	64	17.9	11.4	51.9	3657	1
c122	26	0	160	67	25.922	11.9	51.8	2890	1
c329	34	1	169	68	26.5807	12	51.8	3120	1
c458	20	0	136	64	23.3	12.2	51.8	3170	1
c474	36	0	230	64	40.8	12	51.8	3405	1
c249	35	1	113	62	21.3792	12.6	51.5	3070	1
c535	23	0	125	63	22.2	11.3	51.5	2977	1
c45	33	0	134	63	24.5539	13.4	51.4	3415	1
c143	29	0		65		11.7	51.3	3240	1
c932	26	3	190	63	33.7	12.2	51.3	1133	1
c156	22	0	145	63	26.5695	11.9	51.1	3717	1
c207	31	1	150	66	25.0438	11.7	51.1	3827	1
c169	41	3	199	66	33.2248	11.6	50.9	3410	1
c676	30	0	125	63	22.2	11.5	50.9	3230	1
c234	40	1	147	66	24.543	11.7	50.7	3424	1
c550	33	0	107	60	20.9	11.5	50.7	3630	1
c890m	31	1	140	64	24.1	13	50.6	2936	0
c735m	37	1	120	63	21.3	12.3	50.2	2693	0
c244	35	1	115	65	19.7956	12	49.7	3205	1
c524LTF	24	0	143	63	25.4	12.4	49.7
c342	31	3	105	67	17.0113	11.7	49.6	3937	1
c521	33	1	220	71	30.7	12	49.6	4105	1
c838m	29	1	122	68	18.6	12.3	49.5	3635	1
c837m	35	0	170	65	27.5	12.1	49.4	2781	1
c717m	39	2	155	63	27.5	13.1	49.4	3748	1
c56	33	2	185	64	32.848	11.4	49.3	3889	1
c284	30	0	165	62	31.2175	11.6	49.3	3380	0
c885m	31	1	138	61	26.1	12.1	49.3	3090	1
c385	26	0	146	63	26.7528	12.2	49.2	3271	1
c764	28	0	125	64	21.5	11.5	49.2	2440	0
c12	35	1	110	65	18.9349	12.1	49.1	3541	1
c652m	36	1	125	64	21.5	13	49.1	2949	1
c898m	32	0	142	66	23	12.2	49.1	3425	1
c194	38	1	150	64	26.6335	11.9	49	4248	1
c243	36	4	130	69	19.8583	11.6	49	2855	0
c345	42	2	123	60	24	11.6	48.9	2135	1
c384	21	0	125	64	22.1946	12.2	48.9	2370	0
c461	31	1	115	66	18.6	12.5	48.8	3348	1
c922m	38	1	160	65	26.6	12.1	48.8	3430	1
c915	30	0	163	65	27.1	11.6	48.7	3494	1
c765	32	1	124	62		12.5	48.6	3008	1
c877	35	1	125	63	32.2	12.1	48.5	3729	1
c771m	35	2	180	65	29.1	11.4	48.5	3547	1
c590	34	1	140	63	24.8	11.4	48.4	2245	0
c864	35	0	230	62	42.1	12.5	48.37	4256	1
c873	29	1	138	62	25.3	12.6	48.2	3364	1
c946m	33	0	150	66	24.2	12.2	48.2	4050	0
c105	20	0	160	64	28.4091	13	48.1		0
c478	32	1	105	63	18.6	12	48.1	3180	1
c393LTF	37	1	128	65	22.0333	12.2	48
c53	28	0	160	64	28.4091	12.7	47.8	4042	1
c153	26	2		63		12.1	47.7	3250	1
c280	35	1	176	67	28.5142	11.9	47.6	2921	1
c42	37	3	160	68	25.1651	11.6	47.5	3285	1
c691	33	1	150	63	26.6	12.2	47.5	3760	1
c314	23	0	165	67	26.732	12.1	47.4	2120	0
c475	34	1	180	64	30.9	12.2	47.4	2750	0
c719m	37	0	285	66		12.2	47.4	3292	1
c25	25	0	127	64	22.5497	11.6	47.08	3625	1
c235	30	3	175	66	29.2178	12	46.9	3460	0
c383	21	0	174	65	29.9516	12	46.9	2750	1
c924m	38	2	155	66	25.1	12	46.9	3123	1
c178	39	2	240	63	43.9772	12.1	46.8	3330	1
c315	34	1	130	65	22.3776	11.4	46.8	3380	1
c66	37	2	175	66	29.2178	13	46.6	335	1
c118	32	1	155	65	26.681	12.4	46.6	3944	1
c367	34	0	220	69	33.6064	13.3	46.6	3840	1
c216	38	3	150	65	25.8203	12.9	46.5	3660	1
c80	29	0		64		11.6	46.2	4058	1
c223	34	0	103	63	18.8735	12.7	46.2	3840	1
c787	35	2	158	68	24	12.6	46.2	3724	1
c88	34	1	166	66	27.7152	12.7	46.1	3417	1
c202	27	4	195	71	28.1329	13.1	46.1	2565	0
c822	37	0	120	62	22	11.3	46.1	3433	1
c126	29	1	245	67	39.693	11.6	46	2951	1
c120	28	0	160	67	25.922	11.9	45.8	2995	0
c215	30	0	150	63	27.4857	12.8	45.8	3713	0
c225	32	1	113			11.9	45.6	3390	1
c360	31	1		64		12	45.6	3975	1
c774m	31	1	125	65	20.8	12.5	45.6	3206	1
c718m	36	1	155	67	24.3	12	45.6	3487	1
c459	25	0	125	62	22.9	12	45.5	3462	1
c174	35	0	165	66	27.5482	11.6	45.4	2752	1
c160	32	0	120	67	19.4415	13.4	45	3100	1
c222	27	0	100	63	18.3238	12	44.9	3685	1
c343	21	1	235	63	43.061	12	44.9	3335	0
c373	30	0	125	64	22.1946	12.6	44.9	3578	1
c48	34	0	240	64	42.6136	11.4	44.8	3105	0
c123	39	1		60		12.1	44.8	3525	1
c150	24	5	130	61	25.4086	11.6	44.7	3235	1
c629	20	0	210	61	39.7	11.3	44.6	3555	1
c649m	33	1	160	62	29.3	12	44.6	4001	1
c335	27	0	216	66	36.0631	12	44.5	3610	1
c261	23	1	140	63	25.6534	13.4	44.4	3149	0
c327	39	2	133	64	23.6151	13.4	44.4	3230	1
c23	35	2	130	65	22.3776	12.9	44.3	2669	1
c840m	34	0	117	64	20.1	11.6	44.3	3208	1
c502	29	0	170	65	28.3	11.5	44.2	1580	1
c212	34	0	162	67	26.246	11.4	44.1	3110	1
c462	41	0	145	61	27.4	12.4	44.1	1770	0
c291	37	2	130	60	26.2626	12.4	44	2659	0
c713m	31	0	147	66	23.7	12	44	3036	1
c183	30	0		61		12	43.9	2930	1
c157	38	4	130	62	24.5956	11.6	43.8	3405	0
c395	19	1	200	65	34.4271	11.6	43.7	3730	1
c74	30	0	105	65	18.0742	12.3	43.6	3720	1
c204	26	5	176	62	33.2986	13.4	43.5	2794	0
c578	34	2	175	64	30.1	11.6	43.5	3215	1
c865	31	0	125	62	22.9	11.6	43.5	2185	0
c358	37	1	148	63	27.1193	13.3	43.4	3708	1
c538	19	0	170	67	26.7	11.4	43.4	2931	1
c894m	30	1	175	65	28.3	11.5	43.4	3235	1
c276	31	0	140	63	25.6534	12.3	43.3	3774	1
c556	20	0	110	65	18.3	13.5	43.2	3350	1
c141	38	1	161	69	24.5938	12	43.1	3614	1
c195	39	3	125	64	22.1946	11.6	43.1		0
c101	38	1	235	68	36.9613	11.7	43	4133	1
c593	34	3	165	66	26.7	11.4	43	3420	1
c729m	35	0	170	64	29.2	12.5	43	3390	0
c51	38	3	190	71	27.4116	11.9	42.8	3845	1
c236	34	0	134	68	21.0758	13	42.8	3764	1
c596	23	1	269	65	44.8	12.2	42.8	1780	0
c543	26	1	175	62	32	11.5	42.7	3010	0
c666	31	0	150	68	22.8	11.2	42.7	3232	1
c509	32	0	125	65	20.2	12.2	42.5	3657	0
c899m	37	4	145	66	23.4	12.5	42.5	3320	1
c882m	34	2	145	69	21.4	11.6	42.5	4512	1
c275	39	0	100	62	18.9197	11.9	42.4	3415	1
c781	32	1	130	64	22.3	13.1	42.31	3198	1
c672	35	3	103	61	19.5	11.6	42.25	2845	0
c843	30	0	125	67	19.6	13.1	42.21	3310	1
c271	29	0	175	69	26.7324	11.9	42.1	3144	1
c728m	34	2	123	68		11.3	42.1	3235	1
c8	22	3	125	62	23.6496	11.6	42.02	2752	1
c242	25	3	124	60	25.0505	12.2	42	2975	1
c580	30	1	114	64	19.6	12.2	42	2730	1
c682m	34	1	110	64	18.9	13.1	42	3374	1
c214	36	0	178	63	32.6164	12.4	41.9	3194	1
c369	26	0	170	64	30.1847	12.3	41.9	3080	1
c783	31	0	118	62	21.6	12.2	41.9	2866	1
c152	27	1	130	66	21.7047	12	41.8	4303	1
c197	35	2	167	62	30.5	12.1	41.8	3546	1
c950m	39	3	140	64	24.1	12.1	41.8	3489	1
c516	36	1	245	65	40.8	11.5	41.7	2640	0
c166	30	2	210	64	37.2869	12.3	41.5	4059	1
c710	34	3	155	69	22.9	11.6	41.5	3657	1
c925m	33	2	239	67	37.5	13.2	41.5	3158	1
c598	35	3	200	62	36.6	11.3	41.4	3980	1
c65	35	3	120	68	18.8739	13.8	41.3	3464	1
c256	34	2	160	68	25.1651	12.7	41.3	3596	1
c311	30	0	150	67	24.3018	11.6	41.3	4208	1
c921m	35	1	145	67	22.7	11.3	41.3	2910	1
c217	35	3	180	64	31.9602	11.6	41.2	3864	1
c487	34	1	135	65	22.5	12.2	40.9	3150	1
c801m	34	2	127	62	23.3	11.4	40.8	3060	1
c233	28	0	150	69	22.9134	11.6	40.7	3250	0
c11	28	2	130	60	26.2626	11.6	40.68	3060	1
c281	28	0	120	66	20.0351	14.1	40.6	2655	0
c481	33	1	125	66	20.2	12.5	40.6	2724	1
c44	40	2	145	66	24.209	12.3	40.5	3235	1
c100	38	2	203	66	33.8926	12.1	40.4	3195	1
c190	33	1	152	67	24.6259	11.7	40.4	3031	1
c693	36	3	180	71	25.1	12.1	40.34	3820	1
c64	39	2	198	65	34.0828	11.4	40.3	2298	0
c167	35	1	110	63	20.1562	11.4	40.3	3248	1
c267	36	0	158	65	27.1974	11.6	40.3	4158	1
c818m	32	1	120	63	21.3	11.4	40.3	3775	1
c657m	32	0	120	64	20.6	12.5	40.2	3099	1
c201	37	0	110	62	20.8117	11.7	40.1	2850	1
c288	26	2	234	64	41.5483	12.1	40.1	4315	1
c482	36	1	145	69	21.4	12.1	40.1	3910	1
c498	37	1	138	64	23.7	12	40.1	3285	1
c605	30	0	175	66	28.3	12.1	40.1	3925	0
c130	31	0	200	66	33.3918	11.6	40	2111	0
c430	23	1	120	60	23.5	11.3	39.9	3745	1
c800m	29	0	112	65	18.6	12.6	39.8	3065	1
c696	27	0	170	68	25.9	11.3	39.5	3020	1
c49	34	1	110	62	20.8117	13	39.4	2785	1
c290	36	1	185	63	33.8991	11.7	39.4	3785	1
c323	39	3	118	62	22.3252	12.4	39.4	3519	1
c518	41	1	120	66	19.4	11.3	39.4	1810	0
c815m	37	1	120	62	22	11.6	39.4	2611	0
c248	28	0	152	70	22.5603	12.4	39.2	3521	1
c324	30	0	150	70	22.2634	12	39.2	3008	1
c413	34	1	115	66	18.6	11.5	39.2	3067	1
c537	19	1	250	67	39.2	11.3	39.1	1190	1
c16	35	1	190	64	33.7358	12.7	38.93	3613	1
c610	32	1	140	72	19	11.3	38.9	3715	1
c129	26	2	190	65	32.7058	11.7	38.7	1350	1
c184	27	0	154	62	29.1363	11.7	38.7	3060	0
c238	37	3	156	64	27.6989	12.6	38.7	3736	1
c309	26	0		65		12.6	38.7	3355	1
c727m	38	0	130	66	21	11.5	38.6	3121	1
c904m	36	1	170	67	26.7	11.5	38.5	3536	1
c304	28	0	130	69	19.8583	11.7	38.4	2805	1
c819m	32	1	108	63	19.1	11.6	38.4	3263	1
c4	38	1	180	65	30.9844	13.1	38.34	2490	0
c135	31	2	160	66	26.7134	11.7	38.3	3589	1
c254	28	3	130	67	21.0616	12.9	38.3	3235	1
c272	19	0	160	64	28.4091	11.7	38.2	3002	1
c905m	37	1	197	65	32.8	12.1	38.2	2781	0
c133	32	2	198	68	31.1419	12.6	38.1	3380	1
c104	29	0	145	67	23.4918	11.6	38	3804	0
c108	38	0	130	62	24.5956	12	37.9	680	0
c396	30	0	135	67	21.8716	11.4	37.9	3405	1
c68	34	1	118	62	22.3252	11.6	37.8	3363	1
c250	24	1	145	64	25.7457	11.5	37.8	2004	0
c741m	31	1	279	67		12.4	37.8	3717	1
c909m	35	0	135	64	23.2	12.2	37.8	3328	1
c376	38	0	175	66	29.2178	12.6	37.7	3010	0
c810m	30	0	125	63	22.2	13.2	37.7	2905	1
c806m	31	1	120	66	19.4	12.1	37.7	3093	1
c76	38	0	128	65	22.0334	12	37.6	3374	1
c270	40	1	108	62	20.4333	11.4	37.6	2894	1
c112	34	1	138	68	21.7049	12.1	37.5	3635	1
c831m	35	3	185	69		12.1	37.5	4114	1
c149	30	0	130	62	24.5956	12	37.4	2400	0
c147	36	1	233	63	42.6945	11.5	37.3	3798	1
c549	32	3	120	63	21.3	11.4	37.3	3765	1
c232	34	0	128	64	22.7273	11.9	37.2	2440	1
c308	39	0	160	63	29.3181	11.9	37.2	2690	0
c286	37	1	145	62	27.4336	11.9	37.1	3084	1
c545	38	0	160	65	26.6	11.5	37.1	2350	0
c640	22	0	140	67	22	11.6	37.03	3190	1
c506	33	1	126	64	21.6	11.6	37	3695	0
c807m	39	1	210	64	36	11.3	37	3912	1
c664	31	0	150	65	25	13.1	36.96	2700	1
c450	23	2	142	60	27.8	11.3	36.9	4450	1
c581	18	0	115	61.5		11.5	36.9	2750	1
c206	17	1	120	65	20.6563	11.7	36.8	3260	1
c522	29	1	170	65	28.3	12.2	36.8	3859	1
c582	40	2	155	70	22.3	12	36.8	3925	1
c891m	25	0	129	67	20.2	12	36.8	3203	1
c743m	39	4	138	62	25.3	11.4	36.7	3790	1
c266	31	1	180	68	28.3108	11.7	36.5	2815	0
c668	34	0	140	65	23.3	11.4	36.35	2625	0
LTFc124	25	2	145	63	26.5695	12	36.3		0
c177	23	3	130	63	23.821	12.4	36.3		0
c371	37	0	134	68	21.0758	13.1	36.3	4905	1
c919	32	3	200	68	30.4	11.5	36.3	2640	1
c680	37	3	150	65	25	12.6	36.2		0
c213	34	2	115	62	21.7576	11.4	36	4143	1
c175	40	1	130	69	19.8583	12	35.8	3470	1
c98	30	2	182	66	30.3865	11.4	35.7	3570	1
c285	24	3	200	61	39.0902	12.4	35.7	1400	1
c34	31	0	299	67	48.4416	12.1	35.51	3485	1
c203	33	1	160	62	30.2715	11.4	35.5	4245	1
c226	35	0	120	64	21.3068	11.4	35.5	3235	1
c900m	35	1	127	67	19.9	11.4	35.4	3602	1
c468	19	0	130	63	23	12	35.3	790	0
c940	36	2				11.4	35.3	3112	1
c95	37	0	195	67	31.5924	11.4	35.1	3247	0
c239	36	1	115	62	21.7576	11.4	35.1	3499	1
c650m	28	0	160	66	25.8	12	35.1	3345	1
c694	28	0	130	64	22.3	11.3	35.06	3488	1
c55	22	2	171	63	31.3337	11.7	35	2995	1
c144	34	2	124	63	22.7215	11.9	35	2743	1
c834m	31	2	120	66	19.4	11.3	35	3405	1
615 LTF	30	0	120	59	24.3	11.6	34.99
c180	30	1	185	65	31.8451	12.6	34.9	4054	1
c200	40	1	130	65	22.3776	13.1	34.8	3487	1
c279	30	0	130	63	23.821	12.6	34.8	3552	1
c21	19	0	129	66	21.5377	11.7	34.7	2670	0
c43	39	2	185	63	33.8991	11.9	34.7	92	1
c181	35	2	220	70	32.6531	11.7	34.7	4430	1
c514	26	0	145	68	22.1	11.6	34.7	3455	1
c793m	29	1	108	67		11.5	34.6	2282	0
c962	18	0	150	66	24.2	13.1	34.4	2846	1
c89	26	0	180	63	32.9829	12.9	34.3	2700	1
c361	24	4	210	69	32.0788	12.1	34.2	4315	1
c663	23	0	90	59	18.2	13.1	34.14	2795	1
c948m	32	0	109	64	18.7	13.2	34.1	2949	1
c700	32	0	115	62	21	12.5	34.06	4036	1
c199	30	0	125	62	23.6496	12.7	34	110	1
c220	36	1	155	63	28.4019	11.4	34	4040	0
c331	31	0	160	69	24.441	11.6	34	3292	0
c321	35	1	135	64	23.9702	11.6	33.9		0
c613	26	0	130	69	19.2	12	33.9	3397	1
c736m	35	1	170	68	25.9	12.5	33.9	3178	1
c889m	20	0	130	68	19.8	12	33.9	3610	1
c91	41	0	115	62	21.7576	12	33.8	3050	1
c359	29	0	105	61	20.5223	12.6	33.8	2721	0
c320	25	1	100	64	17.7557	12.7	33.5	2235	0
c575	35	1	260	63	46.1	12.2	33.5	3995	1
c73	35	1	130	65	22.3776	11.4	33.4	3519	1
c110	24	0	132	64	23.4375	11.4	33.4	3940	0
c72	36	1	255	69	38.9529	13.3	33.2	2994	1
c158	35	2	135	64	23.9702	11.4	33.2	2735	1
c227	26	0	245	66	40.9049	12	33.2	2917	1
c621	31	1	140	66	22.6	11.3	33.2	1860	1
c332	32	0	215	65	37.0091	12.1	33	3065	1
c106	40	1	289	63	52.9559	13.1	32.9	2690	1
c442	39	0	240	64	41.2	13.1	32.9	1925	0
c555	36	2	270	64	46.4	12.3	32.9	3900	1
c231	35	0	200	69	30.5513	11.9	32.8	3420	1
c833m	21	0	130	60	25.4	11.6	32.7	3150	0
c139	31	1	188	71	27.123	11.7	32.6	4160	1
c936	25	0	130	64	22.3	12	32.6	3850	1
c205	32	1	132	69	20.1638	12	32.5	3237	1
c839m	31	1	120	66	19.4	12.4	32.5	3150	1
c188	38	3		69		11.4	32.4	3600	0
c268	21	0	100	67	16.2012	11.4	32.4	3725	1
c218	41	1	125	65	21.5169	12.6	32.3	3340	1
c127	35	4	175	65	30.1237	11.7	32.1	3717	1
c273	32	0	115	67	18.6314	11.6	32.1	2365	0
c704	18	0	168	62	30.8	12.3	32.02	2820	0
c165	35	0	200	65	34.4271	11.4	32	2582	0
c162	24	0	296	62	56.0023	12.4	31.9	3282	0
c400	31	1		60		11.6	31.9	3160	0
c938	32	1	170	65	28.3	11.3	31.9	1795	0
c193	33	2	112	66	18.6994	13.2	31.6	2885	1
c265	25	0	125	63	22.9048	12	31.6	2950	0
c457	33	0	120	65	20	11.5	31.6	3490	1
c520	33	0	140	62	25.6	11.3	31.6	2965	1
c187	31	0	150	66	25.0438	11.9	31.4	1474	1
c87	25	1	165	61	32.2494	13.3	31.2	3200	0
c77	33	1	180	63	32.9829	12.4	31.1	3490	1
c148	32	0	180	62	34.0554	13.1	31.1	1340	0
c179	19	0	127	65	21.8612	11.7	31.1	3458	0
c274	28	0	145	63	26.5695	13	31.1	2925	0
c97	37	1	170	66	28.383	11.7	31	3239	1
c102	31	0	128	65	22.0334	12	31	3228	1
c185	35	2		65		11.6	31	3275	1
c210	35	1	161	67	26.084	11.6	31	3203	1
c573	36	5	187	63	33.2	11.4	31	3400	1
c170	21	2	125	66	20.8699	11.9	30.9	3700	1
c19	37	1	108	67	17.4973	12.1	30.83	3335	1
c317	30	0	106	63	19.4233	11.9	30.8	2910	1
c464	31	1	140	63	24.8	11.4	30.8	3407	1
c128	21	0	140	64	24.858	12.6	30.7	3075	1
c931	26	0	130	65	21.6	12.2	30.7	3705	0
c939	24	0	140	62	25.6	11.6	30.7	3816	1
c953m	36	1	150	67	23.5	12	30.7	3035	1
c853	31	0	116	64	19.9	12	30.43	3890	1
c161	26	3	130	66	21.7047	11.6	30.4	2105	1
c209	28	2	182	65	31.3287	11.9	30.3	3080	1
c587	29	3	130	61	24.6	11.6	30.3	2945	0
c609	33	1	120	64	20.6	11.3	30.3	4394	1
c695	28	0	107	60	21.1	12.1	30.24	3155	1
c125	37	2	112	64	19.8864	11.4	30	3090	1
c295	24	2	155	67	25.1119	13.1	29.9	2975	1
c219	25	2		65		11.9	29.8	4255	1
c269	22	1	136	64	24.1477	12.4	29.8	4226	1
c760	22	0	120	61	22.7	11.4	29.8	3045	0
c292	19	0	140	60	28.2828	12	29.7	2495	0
c479	27	0	119	68	18.1	12.5	29.6	3093	1
c82	40	1	120	62	22.7036	11.4	29.4	3547	1
c59	31	1	226	63	41.4118	11.4	29.2	2660	0
c814m	35	1	145	65	24.1	11.4	29.2	3431	1
c715m	36	1	140	66	22.6	11.3	29.2	3828	1
c171	23	1	227	63	41.5951	11	29.1	960	1
c259	30	0		69		11.9	29.1	3505	0
c387	24	0	135	59	28.2051	11.1	29.1	3490	1
c62	31	0	125	66	20.8699	11.6	28.9	3462	1
c333	35	0	165	70	24.4898	11.7	28.9	2810	1
c334	28	1	165	67	26.732	12.2	28.8	2685	0
c398	18	1	125	62	23.6496	12.2	28.6	2830	0
c444	35	0	175	68	26.7	11.3	28.4	3660	1
c54	28	0	230	65	39.5912	12.4	28.2	3770	1
c208	19	1	165	67	26.732	12.1	28.1	3509	1
c562	18	0	135	65	22.5	11.5	28.1	3700	1
c563	18	0	169	63	30	11.3	28.1	3670	1
c38	32	0	162	68	25.4797	12.4	27.9	3280	1
c40	35	4	150	61	29.3176	11.4	27.9	3070	1
c57	35	0	145	67	23.4918	12.3	27.9	4746	1
c52	26	1	195	67	31.5924	13	27.5	3275	0
c703	36	1	158	65	27.1	11.3	27.31	3600	1
c505	21	0	125	60	24.5	12.1	27.3	2700	0
c85	20	0	165	62	31.2175	11.7	27.2	2667	0
c930m	38	1	130	60	25.4	12	27.2	2605	0
c29	39	4	115	60	23.2323	12	27.03	3695	1
c92	38	0	160	64	28.4091	12	26.9	3131	1
c237	25	2		62		11.6	26.9	2580	0
c289	24	0	152	62	28.7579	13.1	26.8	3215	0
c586	32	1	115	63	20.4	11.4	26.8	3485	1
c952m	36	2	122	62	22.3	11.6	26.7	3015	1
c24	34	0	142	63	26.0198	11.9	26.57	3480	1
c70	31	0	140	62	26.4876	12.4	26.5	3745	1
c855	40	1	122	64	21	11.4	26.5	3206	1
c566	33	0	100	65	16.7	13.4	26.4	3130	1
c132	37	0	139	67	22.5197	11.9	26.2		0
c159	32	2	125	66	20.8699	11.9	26.2	3916	1
c572	38	1	250	65	40.4	11.3	26	3230	0
c591	21	0	165	65	27.5	11.6	25.9	3095	1
c192	37	1	160	65	27.5417	11.5	25.8	2636	0
c871 LTF	35	0	120	63	21.3	11.6	25.4
c69	24	2	185	67	29.9723	12.3	25.1	186	1
c145	37	1	103	66	17.1968	11.7	25.1	2951	1
c405	38	1	135	66	22.5394	11.3	25.1	2796	1
c558	36	0	258	70	37	11.6	25.1	475	0
c835m	30	1	130	62		12.1	25.1	3178	1
c510	33	5	200	61		12	25	2086	0
c595	24	2	150	64	25.8	11.4	24.9	3337	1
c425	31	2	145	65		12.2	24.8	240	0
c172	37	2	155	65	26.681	12	24.6	3305	1
584 LTF	19	0	140	62	25.6	11.6	24.5
c679	36	1		63		11.3	24.49		0
c99	32	1	220	70	32.6531	11.4	24.4	4493	0
c14	19	0	131	62	24.7848	11.6	24.3	3525	0
c299	36	0	205	68	32.2428	12	24.2	3505	1
c257	29	0	125	64	22.1946	12	24.1	2931	1
c617	27	0	139	64	23.9	12.2	24.01	3375	1
LTF C75	18	0	125	65	21.5169	11.6	24
c119	26	0	131	61	25.6041	12.3	23.4	2825	0
c857	40	1	156	64	26.8	11.4	23.4	3310	1
c111	29	1	110	61	21.4996	11.9	23.3	1674	0
c27	31	2	258	68	40.5788	11.4	23.07	3745	1
c861	35	3	131	60	25.6	12.6	23.01	3995	1
c67	37	0	108	68	16.9865	11.6	22.9	3240	1
c808m	36	2	140	66	22.6	12.3	22.9	3575	1
c58	27	1	135	63	24.7372	12.1	22.8	3705	1
c47	34	0	110	59	22.9819	11.4	22.3	3689	1
c84	42	2	165	66	27.5482	11.7	22.3	3235	1
c224	26	2	159	71	22.9392	11.6	22	2693	0
c142	29	5		63		11.4	21.9	2575	1
c229	24	1	160	65	27.5417	11.4	21.8	3515	1
c401	23	0	140	67	22.6817	13.3	21.8	2927	0
c641m	38	1	150	62	27.5	11.5	21.8	3075	1
c350	35	0	138	67	22.3577	12.6	21.7	3390	1
c86	38	2	132	63	24.1875	11.9	21.6	2885	1
c90	30	3	165	71	23.8048	11.9	21.5	4411	1
c467	18	0	170	65	28.3	12	21.4	3610	1
c949m	34	3	140	70	20.1	12	21.4	3810	1
c255	32	0	133	67	21.5476	11.4	21.2	3433	1
c138	31	0	119	65	20.4841	11.1	21.1	3300	0
c7	34	0	104	58	22.4841	11.3	20.93	890	1
c446	41	1	147	66	23.7	11.3	20.9	3852	1
c50	25	0	200	67	32.4024	13.1	20.8	670	1
c18	34	1	145	69	22.1497	11.1	20.5	3178	1
c579	34	0	165	65		11.5	20.5		0
c26	38	3	105	62	19.8657	12	20.37	3655	1
c60	38	3	186	67	30.1343	11.4	19.8	2923	0
c690m	34	0	185	62	33.9	11.4	19.7	2693	1
c850	29	0	165	60	32.2	12.2	19.52	1729	0
c163	32	1	175	65	30.1237	12.3	19.5	2670	1
c708	18	0	115	65	19.2	12.3	19.2	2775	1
c1	21	1		63		11.9	18.35	2345	0
c41	37	1	138	63	25.2869	12.4	17.8	2735	1
c306LTF	31	0	114			11.9	17.8
LTFc155	27	0	141	67	22.8437	12.7	17.7
c33	37	0	132	63	24.1875	12.1	17.34	2923	0
c642m	28	1	268	69	39.6	11.4	16.3	4430	0
c121	36	2	135	67	21.8716	11.7	16	3093	1
c32	22	3	101	63	18.5071	11.7	15.7	3370	1
c93	34	0	120	60	24.2424	11.4	15.4	4114	1
c13	41	0		67		11.6	15.08	3285	1
c61	22	0		58		11.7	14.5	2805	1
c37	36	3	244	68	38.3768	11.3	13.6		0
c107	25	1	125	70	18.5529	11.7	12.6	3000	1
c46	27	0	150	66	25.0438	11.4	12.1	3415	1
c319	28	3	280	68	44.039	11.6	10.1	2375	0
